# Supplementary material for: Molecular network profiling of U373MG human glioblastoma cells following induction of apoptosis by novel marine-derived anti-cancer 1,2,3,4-tetrahydroisoquinoline alkaloids
Source: Cancer Cell Int. 2012 Apr 11;12:14. doi: 10.1186/1475-2867-12-14 (PMC3441782; doi:10.1186/1475-2867-12-14)
Supplement: Additional file 5: Table S4 — The set of 84 genes upregulated in U373MG cells following exposure to ET-770 derivative (the compound 3). [file 1475-2867-12-14-S5.xls]

## Sheet: SupTab4
Additional Table 4 The set of 84 genes upregulated in U373MG cells following exposure to ET-770 derivative (the compound 3)
Fold Change	Entrez Gene ID	Gene Symbol	Gene Name
6.42218	9495	AKAP5	A kinase (PRKA) anchor protein 5
4.90128	60386	SLC25A19	solute carrier family 25 (mitochondrial thiamine pyrophosphate carrier), member 19
4.85794	116039	OSR2	odd-skipped related 2 (Drosophila)
4.79198	284391	ZNF844	zinc finger protein 844
4.62897	1839	HBEGF	heparin-binding EGF-like growth factor
4.37958	993	CDC25A	cell division cycle 25 homolog A (S. pombe)
4.24347	127396	ZNF684	zinc finger protein 684
4.09597	116238	TLCD1	TLC domain containing 1
4.06007	54865	GPATCH4	G patch domain containing 4
4.01375	494143	CHAC2	ChaC, cation transport regulator homolog 2 (E. coli)
4.01071	63967	CLSPN	claspin homolog (Xenopus laevis)
3.90693	374383	B7H6	B7 homolog 6
3.8896	91664	ZNF845	zinc finger protein 845
3.88308	7286	TUFT1	tuftelin 1
3.86421	126068	ZNF441	zinc finger protein 441
3.86244	7678	ZNF124	zinc finger protein 124
3.83557	91624	NEXN	nexilin (F actin binding protein)
3.81017	55879	GABRQ	gamma-aminobutyric acid (GABA) receptor, theta
3.78307	4860	PNP	purine nucleoside phosphorylase
3.77935	9134	CCNE2	cyclin E2
3.77722	126382	NR2C2AP	nuclear receptor 2C2-associated protein
3.77675	81620	CDT1	chromatin licensing and DNA replication factor 1
3.76594	2123	EVI2A	ecotropic viral integration site 2A
3.70584	730051	ZNF814	zinc finger protein 814
3.6921	3222	HOXC5	homeobox C5
3.68169	51200	CPA4	carboxypeptidase A4
3.65892	3552	IL1A	interleukin 1, alpha
3.65207	4929	NR4A2	nuclear receptor subfamily 4, group A, member 2
3.65121	494118	SPANXN1	SPANX family, member N1
3.64771	7643	ZNF90	zinc finger protein 90
3.62969	53944	CSNK1G1	casein kinase 1, gamma 1
3.6284	760	CA2	carbonic anhydrase II
3.61707	55540	IL17RB	interleukin 17 receptor B
3.58115	147949	ZNF583	zinc finger protein 583
3.53257	84140	FAM161A	family with sequence similarity 161, member A
3.5154	91120	ZNF682	zinc finger protein 682
3.50534	79733	E2F8	E2F transcription factor 8
3.49049	374393	FAM111B	family with sequence similarity 111, member B
3.48061	26045	LRRTM2	leucine rich repeat transmembrane neuronal 2
3.46128	56652	C10orf2	chromosome 10 open reading frame 2
3.44894	84798	C19orf48	chromosome 19 open reading frame 48
3.44321	4886	NPY1R	neuropeptide Y receptor Y1
3.39379	90589	ZNF625	zinc finger protein 625
3.39084	29893	PSMC3IP	PSMC3 interacting protein
3.38761	10018	BCL2L11	BCL2-like 11 (apoptosis facilitator)
3.38645	7775	ZNF232	zinc finger protein 232
3.37581	64101	LRRC4	leucine rich repeat containing 4
3.37447	79000	C1orf135	chromosome 1 open reading frame 135
3.33572	93081	C13orf27	chromosome 13 open reading frame 27
3.31801	1647	GADD45A	growth arrest and DNA-damage-inducible, alpha
3.31459	55299	BRIX1	BRX1, biogenesis of ribosomes, homolog (S. cerevisiae)
3.30404	3576	IL8	interleukin 8
3.30225	79612	NAA16	N(alpha)-acetyltransferase 16, NatA auxiliary subunit
3.30164	55646	LYAR	Ly1 antibody reactive homolog (mouse)
3.29109	388567	ZNF749	zinc finger protein 749
3.28543	55329	MNS1	meiosis-specific nuclear structural 1
3.25661	57615	ZNF492	zinc finger protein 492
3.24442	90233	ZNF551	zinc finger protein 551
3.24249	1870	E2F2	E2F transcription factor 2
3.24126	467	ATF3	activating transcription factor 3
3.1792	51163	DBR1	debranching enzyme homolog 1 (S. cerevisiae)
3.16924	1382	CRABP2	cellular retinoic acid binding protein 2
3.16768	1734	DIO2	deiodinase, iodothyronine, type II
3.16734	153733	CCDC112	coiled-coil domain containing 112
3.16432	79973	ZNF442	zinc finger protein 442
3.15225	7556	ZNF10	zinc finger protein 10
3.15143	25888	ZNF473	zinc finger protein 473
3.15043	163059	ZNF433	zinc finger protein 433
3.14805	4602	MYB	v-myb myeloblastosis viral oncogene homolog (avian)
3.14444	3965	LGALS9	lectin, galactoside-binding, soluble, 9
3.11484	51307	FAM53C	family with sequence similarity 53, member C
3.11235	220992	ZNF485	zinc finger protein 485
3.10946	1906	EDN1	endothelin 1
3.08345	9533	POLR1C	polymerase (RNA) I polypeptide C, 30kDa
3.08146	3592	IL12A	interleukin 12A (natural killer cell stimulatory factor 1, cytotoxic lymphocyte maturation factor 1, p35)
3.07001	64859	OBFC2A	oligonucleotide/oligosaccharide-binding fold containing 2A
3.04688	114034	TOE1	target of EGR1, member 1 (nuclear)
3.04058	1604	CD55	CD55 molecule, decay accelerating factor for complement (Cromer blood group)
3.03303	84671	ZNF347	zinc finger protein 347
3.02974	84524	ZC3H8	zinc finger CCCH-type containing 8
3.02701	154064	RAET1L	retinoic acid early transcript 1L
3.01845	64061	TSPYL2	TSPY-like 2
3.01721	51526	C20orf111	chromosome 20 open reading frame 111
3.00159	29080	CCDC59	coiled-coil domain containing 59
The genome-wide gene expression profile was studied on Human Gene 1.0 ST array in U373MG cells following a 24 hour-exposure to the vehicle (DMSO) or the compound 3 at the concentration of IC50. The fold changes greater than 3, calculated by the expression levels in the compound-treated cells divided by those in the vehicle-treated cells, are considered as substantial upregulation. They are listed…
